# Supplementary material
Source: MDPI journal article supplement (https://www.mdpi.com/2311-7524/8/9/834)
Supplement: s1 [file s1]

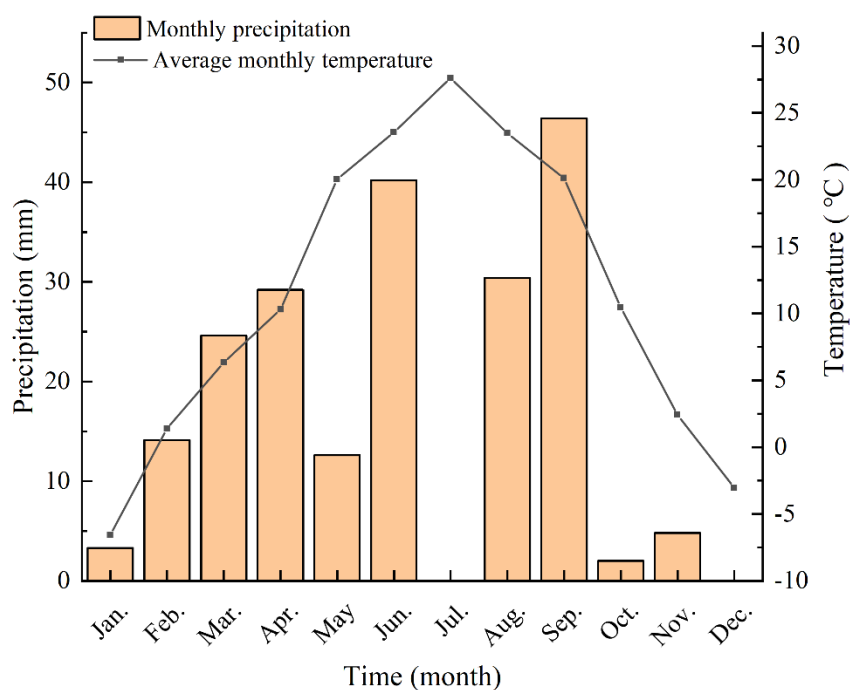

**Figure S1.** Monthly precipitation at the study site in 2020 (bars) and average monthly temperature in 2020 (black line and points). Meteorological data were obtained using a small weather station (RS-QXZM-M1, Shandong, China) located about 100 m away from the study site.

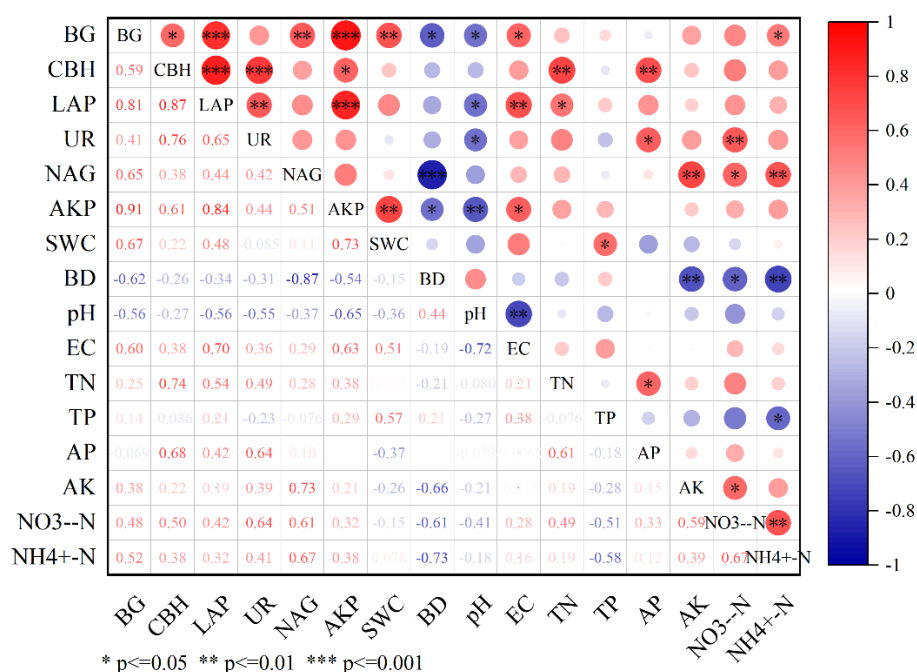

**Figure S2.** Pearson correlation between soil enzyme activities and soil physicochemical properties at the level of 0–20 cm depth of soil under intercropping or monocropping treatments. \* indicates that correlations are significant. Variables: BG:  $\beta$ -glucosidase; CBH: cellobiohydrolase; LAP:

L-Leucine amino peptidase; UR: urease; NAG:  $\beta$ -1,4-N-acetylglucosaminidase; AKP: alkaline phosphatase; SWC: soil water content; BD: bulk density; EC: electrical conductivity; TN: total nitrogen; TP: total phosphorus; AP: available phosphorus; AK: available potassium;  $\text{NO}_3^-$ -N: nitrate nitrogen;  $\text{NH}_4^+$ -N: ammonium nitrogen.

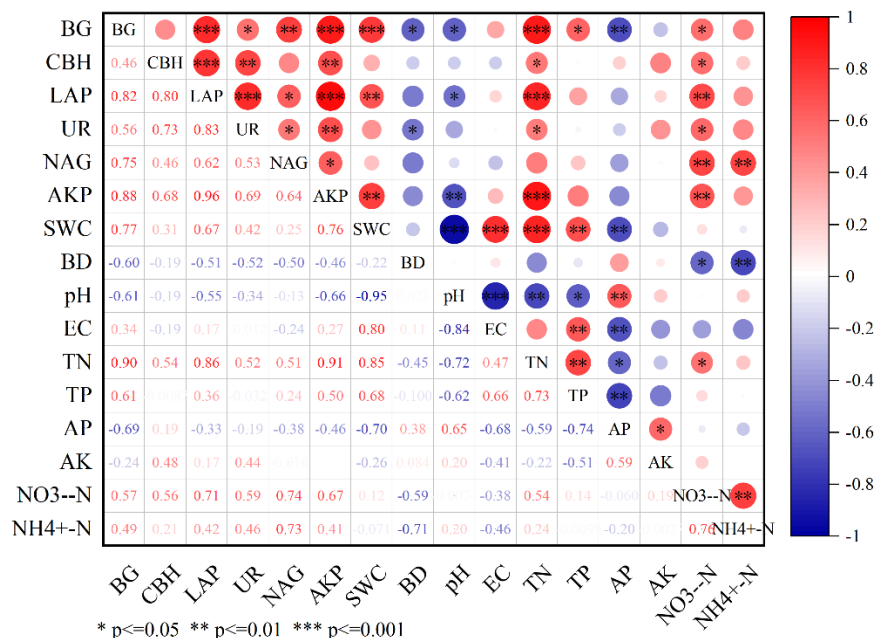

**Figure S3.** Pearson correlation between soil enzyme activities and soil physicochemical properties at the level of 20–40 cm depth of soil under intercropping or monocropping treatments. \* indicates that correlations are significant. Variables: BG:  $\beta$ -glucosidase; CBH: cellobiohydrolase; LAP: L-Leucine amino peptidase; UR: urease; NAG:  $\beta$ -1,4-N-acetylglucosaminidase; AKP: alkaline phosphatase; SWC: soil water content; BD: bulk density; EC: electrical conductivity; TN: total nitrogen; TP: total phosphorus; AP: available phosphorus; AK: available potassium;  $\text{NO}_3^-$ -N: nitrate nitrogen;  $\text{NH}_4^+$ -N: ammonium nitrogen.

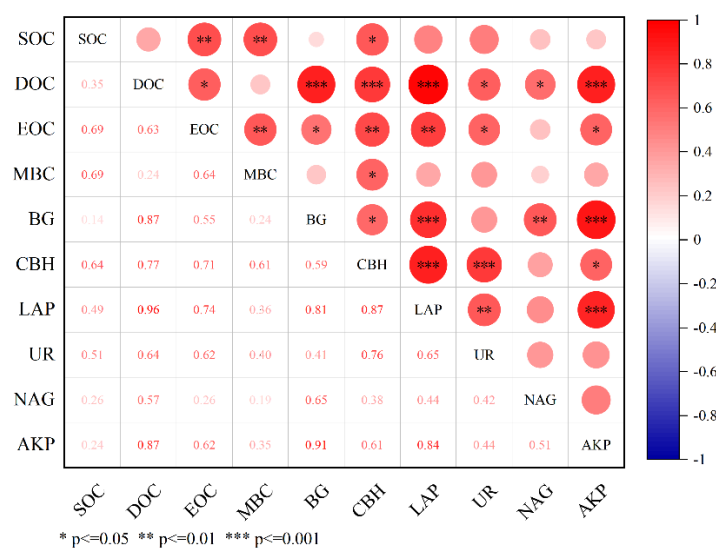

**Figure S4.** Pearson correlation between soil enzyme activities and soil organic carbon fractions at the level of 0–20 cm depth of soil under intercropping or monocropping treatments. \* indicates that correlations are significant. Variables: BG:  $\beta$ -glucosidase; CBH: cellobiohydrolase; LAP: L-Leucine amino peptidase; UR: urease; NAG:  $\beta$ -1,4-N-acetylglucosaminidase; AKP: alkaline phosphatase; SOC: soil organic carbon; DOC: dissolved organic carbon; EOC: easily oxidizable carbon; MBC: microbial biomass carbon.

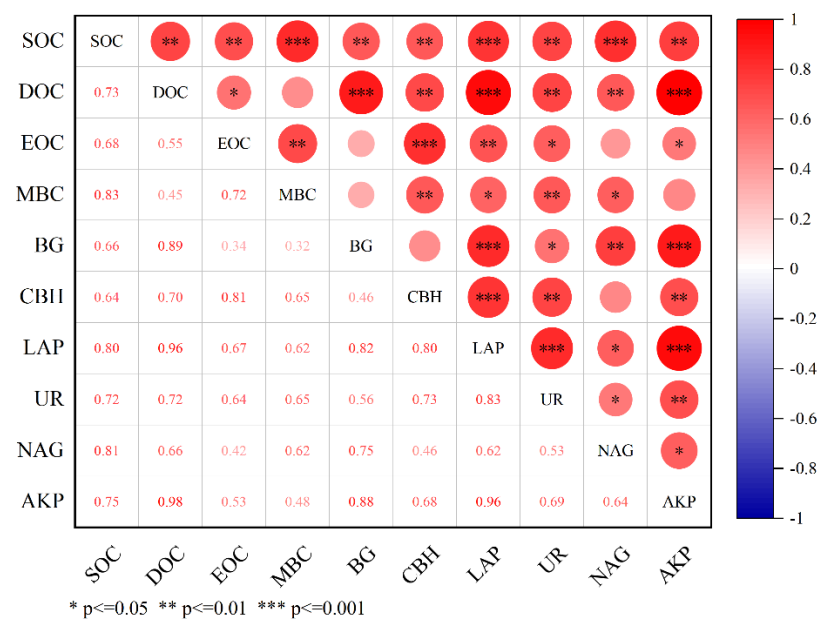

**Figure S5.** Pearson correlation between soil enzyme activities and soil organic carbon fractions at the level of 20–40 cm depth of soil under intercropping or monocropping treatments. \* indicates that correlations are significant. Variables: BG:  $\beta$ -glucosidase; CBH: cellobiohydrolase; LAP: L-Leucine amino peptidase; UR: urease; NAG:  $\beta$ -1,4-N-acetylglucosaminidase; AKP: alkaline phosphatase; SOC: soil organic carbon; DOC: dissolved organic carbon; EOC: easily oxidizable carbon; MBC: microbial biomass carbon.
